# Supplementary material for: A competitive, bead-based assay combined with microfluidics for multiplexed toxin detection
Source: Royal Society of Chemistry journal article supplement (doi:10.1039/d3lc00125c), 2023-01-01
Supplement: d3lc00125c1.pdf [file d3lc00125c1.pdf]

## Electronic Supporting Information

### **A competitive, bead-based assay combined with microfluidics for multiplexed toxin detection**

Hamid Aghamohammadi,<sup>a</sup> Kathryn E Thomas,<sup>b</sup> Sanjana Srikant,<sup>a</sup> Jason Deglint,<sup>b,c</sup> Alexander Wong,<sup>c</sup> and Mahla Poudineh<sup>\*a</sup>

<sup>a</sup> Department of Electrical and Computer Engineering, University of Waterloo, Waterloo, ON N2L 3G1, Canada.

<sup>b</sup> Blue Lion Labs, Waterloo, Ontario, Canada

<sup>c</sup> Department of System Design Engineering, University of Waterloo, Waterloo, Ontario N2L 3G1, Canada

Corresponding author: Mahla Poudineh, [mahla.poudineh@uwaterloo.ca](mailto:mahla.poudineh@uwaterloo.ca)

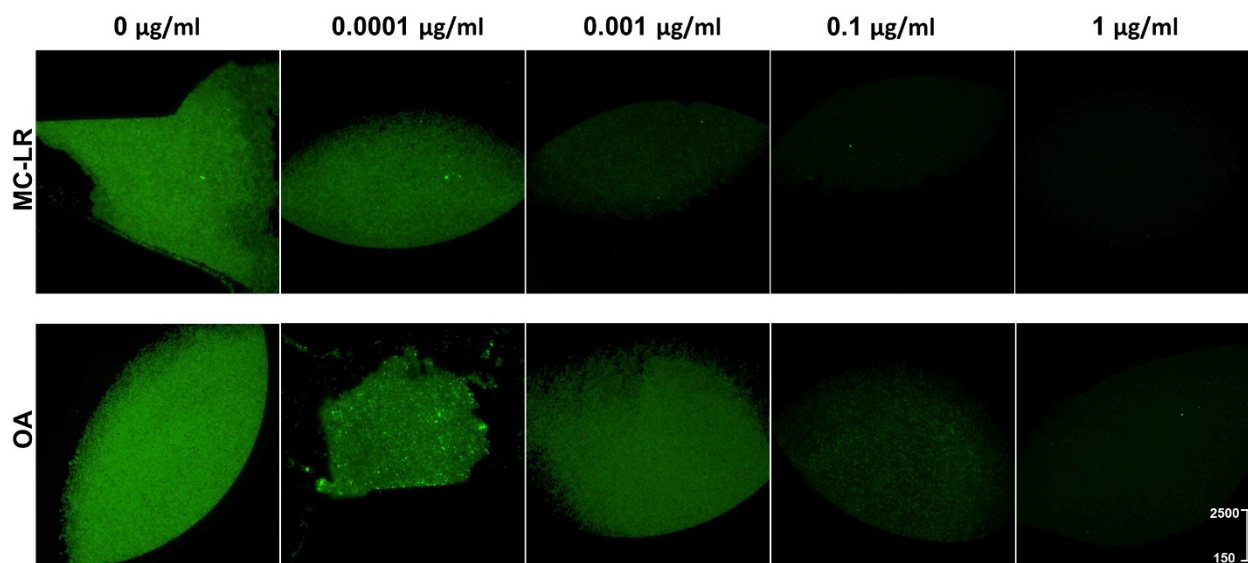

**Figure S1** Fluorescence images of retained beads in the collection chambers. The images show the decrease in the fluorescence signal of beads from left to right by increasing the target toxin concentration.

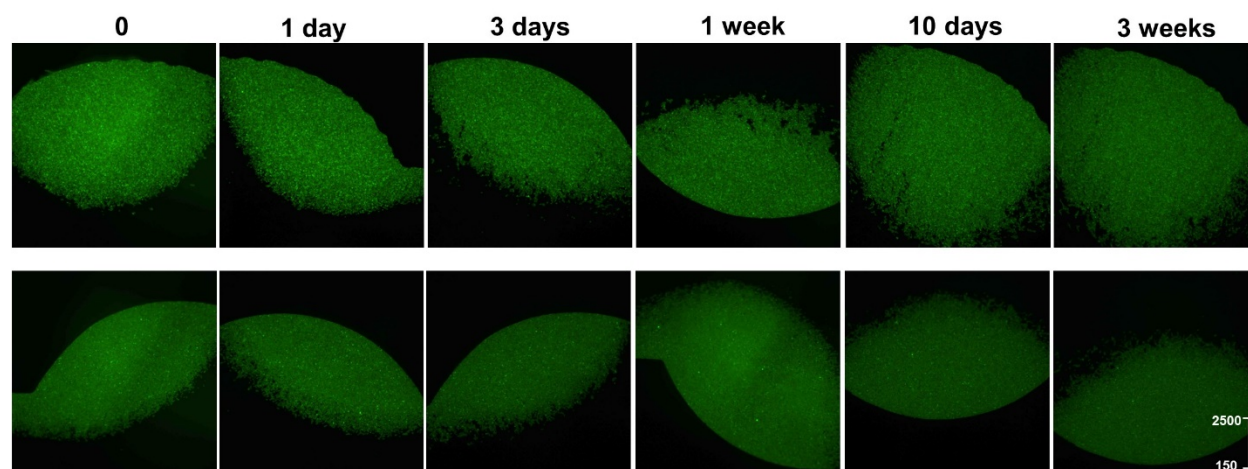

**Figure S2** Monitoring the signal stability of the assay. The images were taken from three beads retained in the chamber in a three-week period.

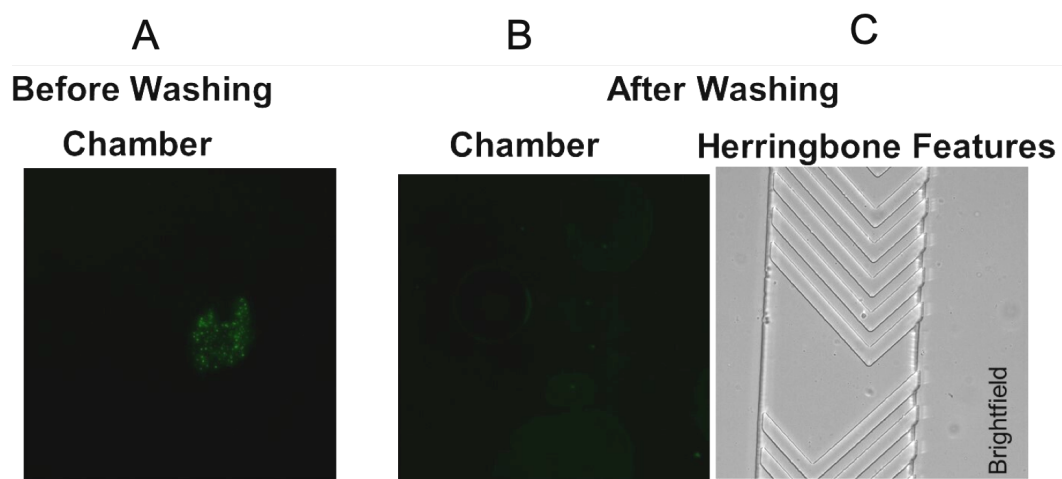

**Figure S3.** A) The chamber of Toxin-Chip where magnetic beads were collected. B) The chamber after washing. C) the herringbone structure after washing.

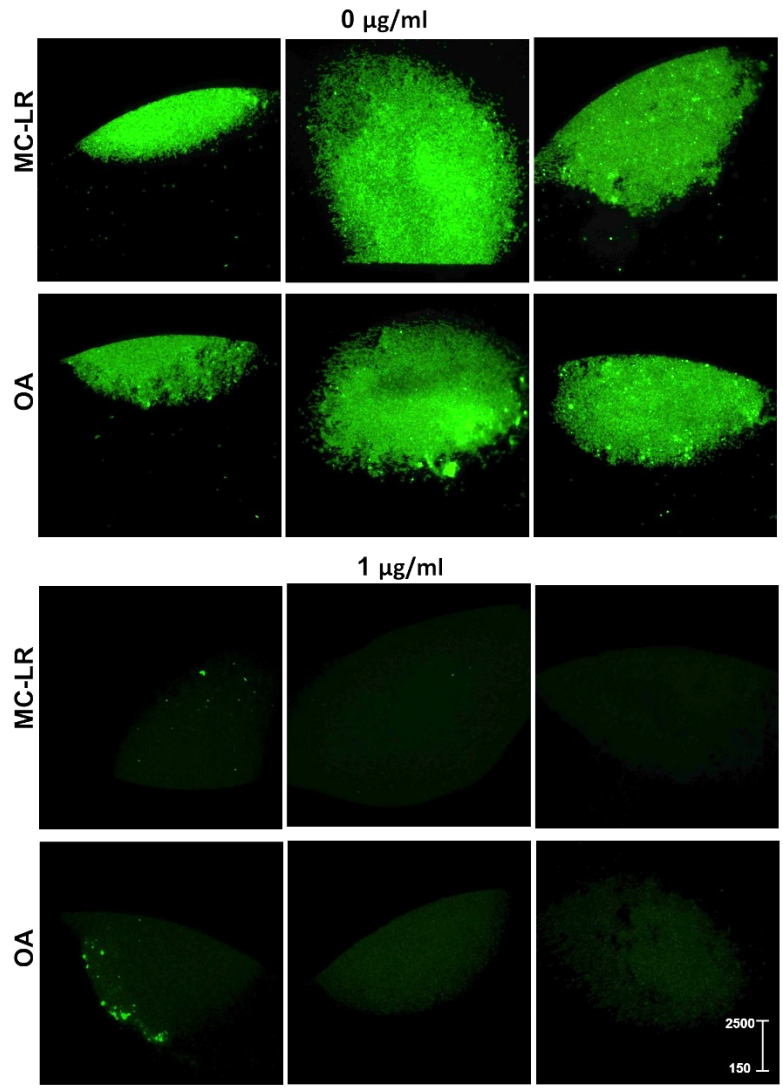

**Figure S4.** Fluorescence images of detecting injected toxin from lake water samples.

**Table S1** Toxin-Chip dimensions

| <b>Geometry</b>               | <b>Dimensions</b> |
|-------------------------------|-------------------|
| Mixing module length          | 30 cm             |
| Mixing module width           | 300 $\mu\text{m}$ |
| Mixing module height          | 45 $\mu\text{m}$  |
| Herringbone structures height | 45 $\mu\text{m}$  |
| Chamber diameter              | 1.5 mm            |
| Chamber height                | 45 $\mu\text{m}$  |

**Table S2** Microscope setting for collecting the fluorescence images

| <b>Setting</b>      | <b>Value</b> |
|---------------------|--------------|
| Magnification       | 30X          |
| Exposure time       | 10ms         |
| Lookup Tables (LUT) | 100-2500     |

**Table S3** Spiked and calculated concentrations of toxin related to Figure 6.

| <b>Spiked conc.</b>                                       | <b>Calculated MC-LR conc.</b> | <b>Calculated OA conc.</b> |
|-----------------------------------------------------------|-------------------------------|----------------------------|
| Sample 1- 0 $\mu\text{g/ml}$ MC-LR, 0 $\mu\text{g/ml}$ OA | 0.0008 $\mu\text{g/ml}$       | 0.00075 $\mu\text{g/ml}$   |
| Sample 2- 1 $\mu\text{g/ml}$ MC-LR, 0 $\mu\text{g/ml}$ OA | 1 $\mu\text{g/ml}$            | 0.00001 $\mu\text{g/ml}$   |
| Sample 3- 0 $\mu\text{g/ml}$ MC-LR, 1 $\mu\text{g/ml}$ OA | 0 $\mu\text{g/ml}$            | 0.75 $\mu\text{g/ml}$      |
| Sample 4- 1 $\mu\text{g/ml}$ MC-LR, 1 $\mu\text{g/ml}$ OA | 0.85 $\mu\text{g/ml}$         | 1 $\mu\text{g/ml}$         |

**Table S4** Spiked and recovered concentration from lake water experiment.

| <b>Spiked conc.</b> | <b>0 <math>\mu\text{g/ml}</math></b> | <b>1 <math>\mu\text{g/ml}</math></b> |
|---------------------|--------------------------------------|--------------------------------------|
| MC-LR               | 0.000028 $\mu\text{g/ml}$            | 0.76 $\mu\text{g/ml}$                |
| error               | 12%                                  | 10%                                  |
| OA                  | 0 $\mu\text{g/ml}$                   | 0.87 $\mu\text{g/ml}$                |
| error               | 8%                                   | 17%                                  |
